# Supplementary material for: Promoting the doping efficiency and photoluminescence quantum yield of Mn-doped perovskite nanocrystals via two-step hot-injection
Source: Royal Society of Chemistry journal article supplement (doi:10.1039/d1cc06219k), 2021-12-02
Supplement: d1cc06219k1.pdf [file d1cc06219k1.pdf]

**Electronic Supporting Information for**

**Promote doping efficiency and photoluminescence quantum yield of Mn-doped perovskite nanocrystals *via* two-step hot-injection**

Yacong Li, Chuying Wang, Guangcai Hu, Wen Meng, Shiqi Sui and Zhengtao Deng\*

*College of Engineering and Applied Sciences, State Key Laboratory of Analytical Chemistry for Life Science,  
National Laboratory of Microstructures, Nanjing University, Nanjing, Jiangsu 210023, P. R. China.*

*Email: dengz@nju.edu.cn*

## EXPERIMENTAL SECTION

**Chemicals.** Cesium carbonate ( $\text{Cs}_2\text{CO}_3$ , 99%), Lead acetate trihydrate ( $\text{PbAc}_2 \cdot 3\text{H}_2\text{O}$ , 99.5%), Manganese acetate tetrahydrate ( $\text{MnAc}_2 \cdot 4\text{H}_2\text{O}$ , 99.0%), 1-octadecene (ODE, 90%), Oleic acid (OA, 85%), Oleylamine (OLA, 90%), Hydrochloric acid (HCl, 36%), Hydrobromic acid (HBr, 48%) and toluene were purchased from Aldrich. All chemicals were used without further purification.

**Two-step hot-injection synthesis of Mn-doped  $\text{CsPbCl}_3$  NCs.** Typically, x mmol  $\text{MnAc}_2 \cdot 4\text{H}_2\text{O}$  ( $x=0.1, 0.3, 0.5, 0.7, 0.9$ ), 1-x mmol  $\text{PbAc}_2 \cdot 3\text{H}_2\text{O}$ , 5 mL OA and 40 mL ODE were added to a 100 mL three neck round bottom flask and degassed 1 hour at 120 °C. The temperature was increased to 180-210 °C under  $\text{N}_2$  atmosphere and 4 mL oleylammonium halide (OLA-HX) precursors (pre-prepared by the same protocol reported by Pradhan et al. *Angew. Chem., Int. Ed.*, 2019, 58, 5552) was injected immediately. Then injecting 6 mL Cs-oleate (pre-prepared by the same protocol reported by Protesescu et al. *Nano Lett.* 2015, 15, 3692) after 30 second, the flash was cooled to room temperature naturally. The NCs were collected by 8000 r/min centrifugation for 5 minutes and then dispersed in toluene. The gram-scale Mn-doped  $\text{CsPbCl}_3$  NCs were synthesized by enlarging all the reaction precursors 10 times. Mn-doped  $\text{CsPb}(\text{Cl}/\text{Br})_3$  NCs were synthesized by injecting the mixture of OLA-HBr and OLA-HCl at a volume ratio of 0.6 to 1.

**Fabrication of LEDs.** Mn-doped  $\text{CsPbCl}_3$  NCs were well mixed with 25% polystyrene (PS)-toluene solution, respectively. Then the mixture was coated on a 375nm LED chip and dried 1 h in the air to obtain an orange LED. White LED was constructed by the same process with Mn-doped  $\text{CsPb}(\text{Cl}/\text{Br})_3$  NCs.

**Characterization.** Powder X-ray diffraction (XRD) was carried out by a Bruker AXS D8 X-ray diffractometer equipped with monochromatized Cu  $\text{K}\alpha$  radiation ( $\lambda = 1.5418 \text{ \AA}$ ). The diffraction pattern was scanned over the angular range of 10-60 degrees ( $2\theta$ ) with a step size of 0.05. Transmission electron microscopy (TEM) was obtained by using a FEI Tecnai G2 F20

electron microscope operating at 200 kV. Scanning electron microscopy (SEM) and energy dispersive X-ray spectroscopy (EDS) were performed on a JEOL JSM-7800F at 10 kV. Inductively coupled plasma optical emission spectrometry (ICP-OES) was performed with an OPTIMA 3300 DV analyzer (PerkinElmer). X-band electron paramagnetic resonance measurements were performed on Bruker EMX PLUS (PPMS) with microwave frequency 9.85 GHz at room temperature. Ultraviolet and visible absorption (UV-vis) spectra were measured by a Shimadzu UV-3600 plus spectrophotometer. Photoluminescence (PL) and the absolute photoluminescence quantum yields (PLQYs) were measured using a Horiba PTI Quanta Master 400 steady-state fluorescence system with an integrated sphere and double checked with a Hamamatsu Photonics Quantaaurus-QY (model:C11347-11) under ambient conditions. Time-Resolved Photoluminescence Lifetime was detected by Edinburgh FLS920 at room temperature.

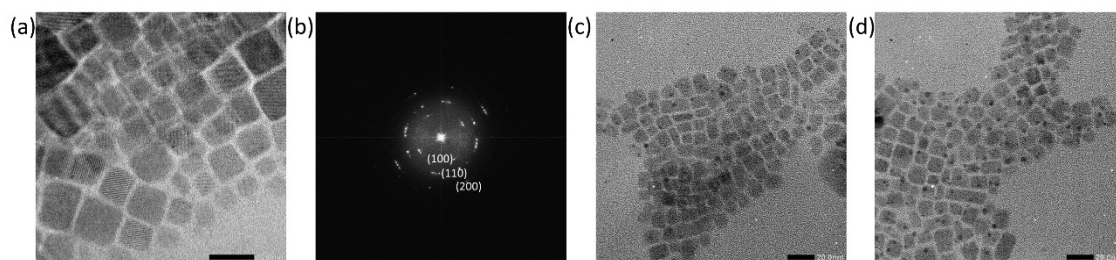

**Fig. S1** a, b) HRTEM image and its FFT pattern of  $\text{CsPb}_{1-x}\text{Mn}_x\text{Cl}_3$  NCs with nominal Mn content of 10 mol%. c, d) HRTEM images of  $\text{CsPb}_{1-x}\text{Mn}_x\text{Cl}_3$  NCs with nominal Mn content of 90 mol%. The black particles around the edges and corners of NCs been  $\text{Pb}^0$  caused by electron beam damage (ACS Nano 2017, 11, 2, 2124–2132; Chem. Mater. 2020, 32, 5410-5423).

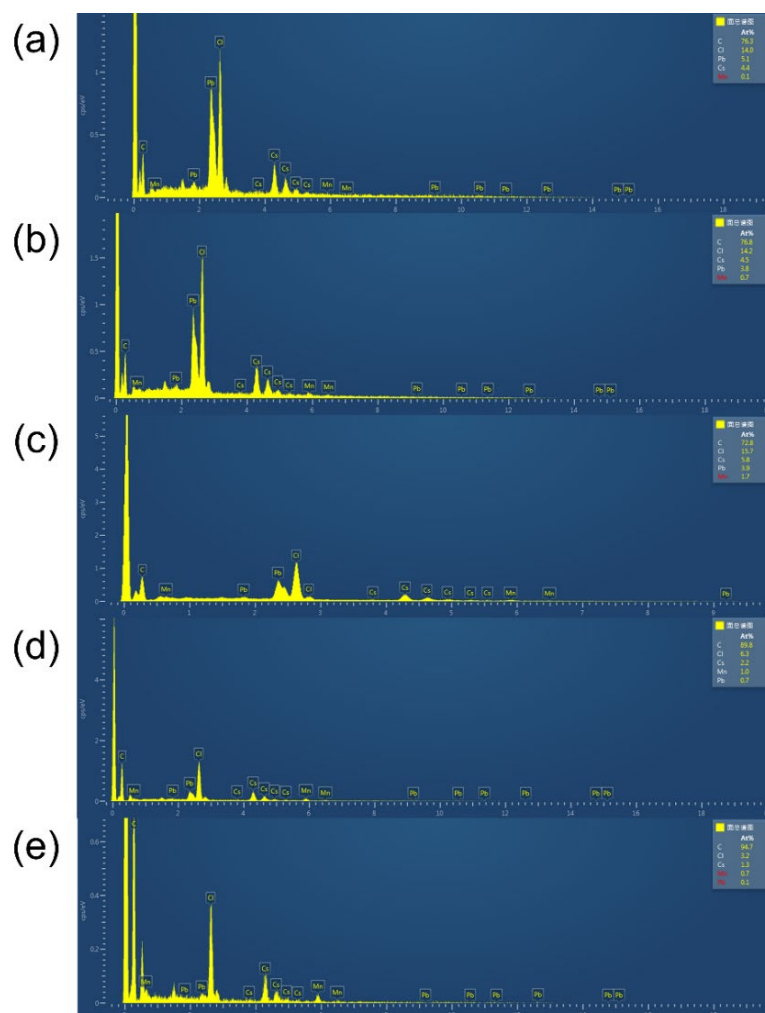

**Fig. S2** Energy dispersive X-ray (EDX) spectra of the  $\text{CsPb}_{1-x}\text{Mn}_x\text{Cl}_3$  NCs synthesized with  $\text{MnAc}_2$ : $\text{PbAc}_2$  molar feed ratios of (a) 0.1: 0.9 (b) 0.3: 0.7 (c) 0.5: 0.5 (d) 0.7: 0.3 (e) 0.9: 0.1.

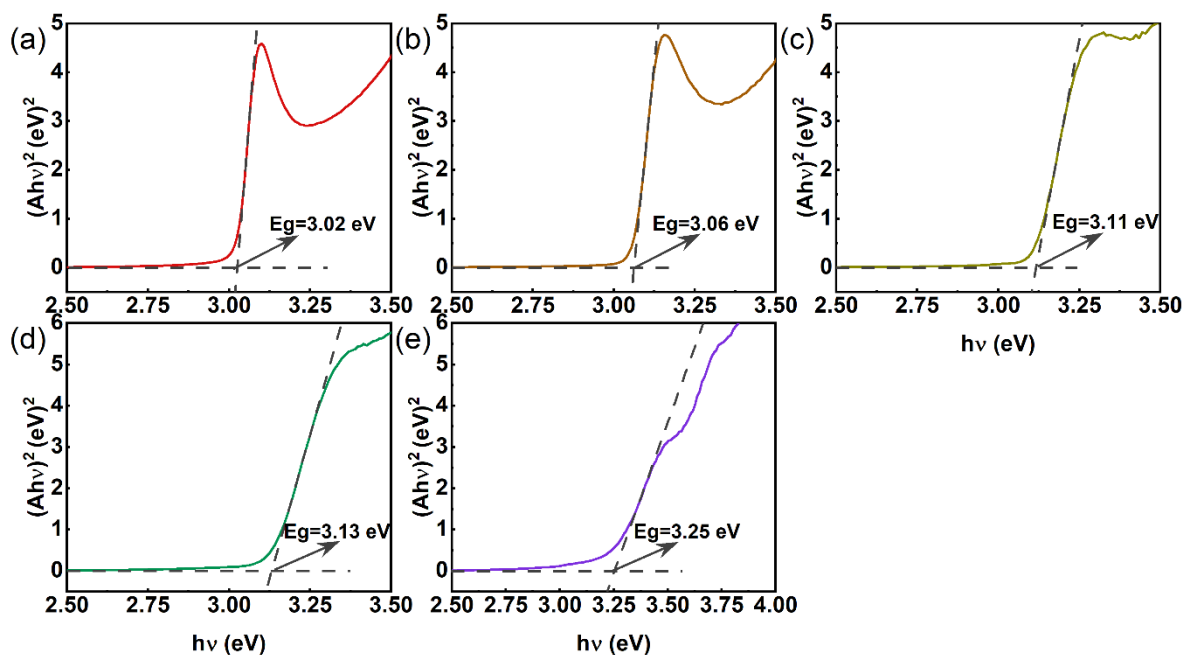

**Fig. S3** Plots of  $(Ah\nu)^2$  vs photon energy ( $h\nu$ ) of the  $\text{CsPb}_{1-x}\text{Mn}_x\text{Cl}_3$  NCs synthesized with  $\text{MnAc}_2:\text{PbAc}_2$  molar feed ratios of (a) 0.1:0.9 (b) 0.3:0.7 (c) 0.5:0.5 (d) 0.7:0.3 (e) 0.9:0.1.

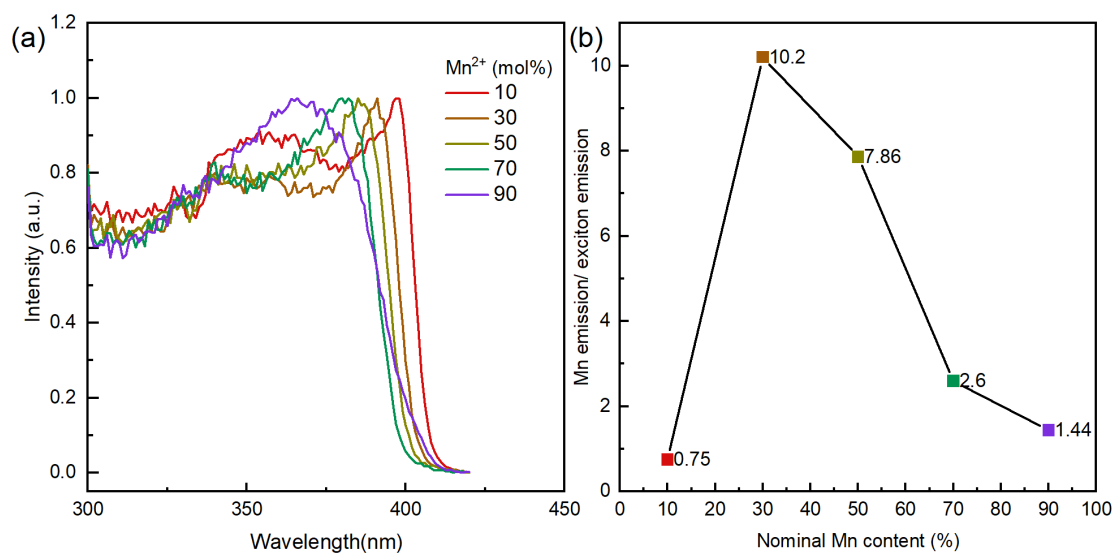

**Figure S4.** (a) Excitation spectrum and (b) Mn emission intensity relative to exciton emission intensity of the  $\text{CsPb}_{1-x}\text{Mn}_x\text{Cl}_3$  NCs with different nominal Mn content (mol%).

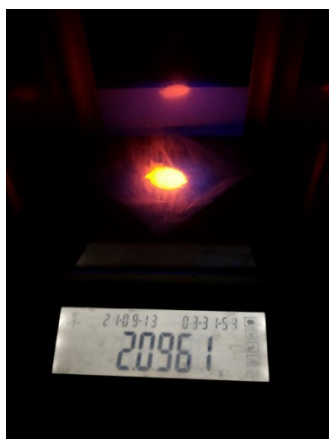

**Fig. S5** Gram-scale  $\text{CsPb}_{1-x}\text{Mn}_x\text{Cl}_3$  NCs synthesized with  $\text{MnAc}_2:\text{PbAc}_2$  molar feed ratios of 3:7.

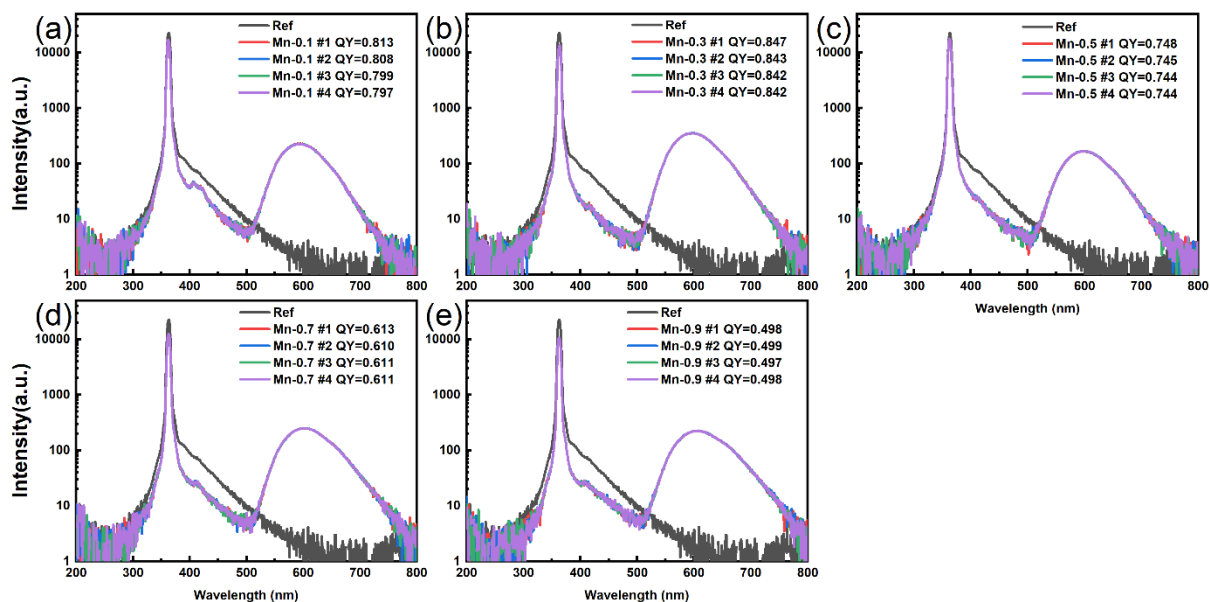

**Fig. S6** PLQYs of  $\text{CsPb}_{1-x}\text{Mn}_x\text{Cl}_3$  NCs synthesized with  $\text{MnAc}_2:\text{PbAc}_2$  molar feed ratios of (a) 0.1:0.9 (b) 0.3:0.7 (c) 0.5:0.5 (d) 0.7:0.3 (e) 0.9:0.1. Each sample was repeated four times, and PLQYs were calculated the average of four times tests.

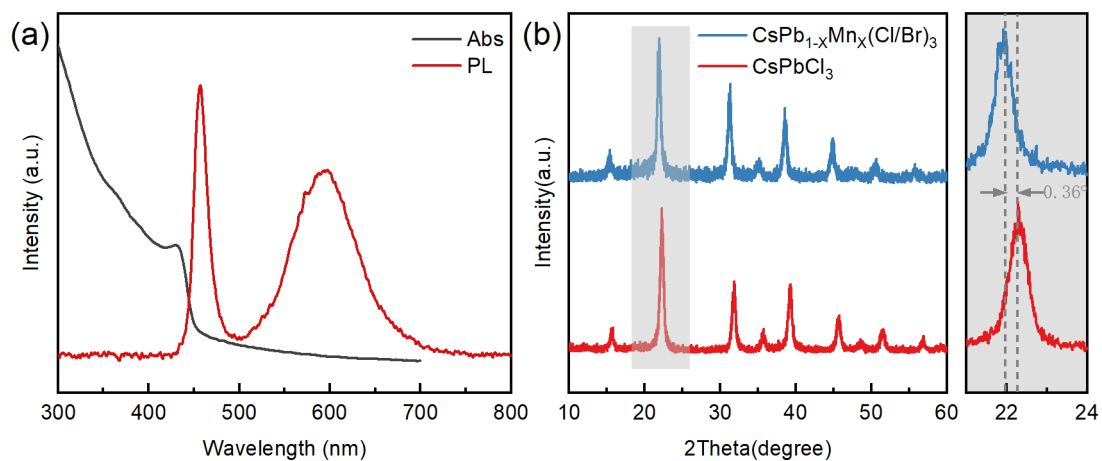

**Fig. S7** (a) UV-vis absorption and PL spectra and (b) Powder XRD patterns of Mn-doped  $\text{CsPb}(\text{Cl/Br})_3$  NCs.

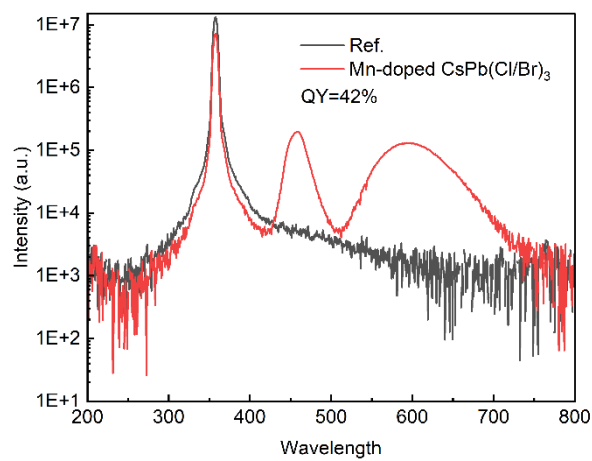

**Fig. S8** PLQY of Mn-doped  $\text{CsPb}(\text{Cl/Br})_3$  NCs.

**Tab. S1** The PL decay curves of Mn<sup>2+</sup> related emission from CsPb<sub>1-x</sub>Mn<sub>x</sub>Cl<sub>3</sub> NCs were fitted by double exponential function (eqs 1):

$$A(t) = A_0 + A_1 \exp(-t/\tau_1) + A_2 \exp(-t/\tau_2) \quad (\text{eqs 1})$$

The average lifetimes ( $\tau_{\text{ave}}$ ) were calculated by eqs 2:

$$\tau_{\text{ave}} = (A_1 \tau_1^2 + A_2 \tau_2^2) / (A_1 \tau_1 + A_2 \tau_2) \quad (\text{eqs 2})$$

The fitting results were as follows:

| Pb to Mn molar feed ratio | A <sub>1</sub> | $\tau_1$ (ns) | A <sub>2</sub> | $\tau_2$ (ns) | $\tau_{\text{ave}}$ (ms) | R <sup>2</sup> |
|---------------------------|----------------|---------------|----------------|---------------|--------------------------|----------------|
| 0.9:0.1                   | 691.06         | 423815.16     | 5364.93        | 1155975.66    | 1.12                     | 0.9996         |
| 0.7:0.3                   | 969.24         | 304296.67     | 5081.68        | 1072498.28    | 1.03                     | 0.9996         |
| 0.5:0.5                   | 1320.19        | 389006.18     | 4611.50        | 1075653.64    | 1.01                     | 0.9996         |
| 0.3:0.7                   | 2094.22        | 231726.21     | 3876.48        | 905463.16     | 0.82                     | 0.9995         |
| 0.1:0.9                   | 2429.65        | 215203.00     | 3511.11        | 903338.72     | 0.80                     | 0.9995         |

**Tab. S2** EDS elements analysis results of CsPb<sub>1-x</sub>Mn<sub>x</sub>Cl<sub>3</sub> NCs synthesized with different MnAc<sub>2</sub>: PbAc<sub>2</sub> molar feed ratios.

| Mn to Pb molar feed ratio | Cs: Pb : Mn: Cl     | Mn/ (Mn+ Pb) |
|---------------------------|---------------------|--------------|
| 0.1: 0.9                  | 1: 1.16: 0.02: 3.18 | 0.017        |
| 0.3: 0.7                  | 1: 0.84: 0.16: 3.15 | 0.160        |
| 0.5: 0.5                  | 1: 0.67: 0.29: 2.71 | 0.302        |
| 0.7: 0.3                  | 1: 0.32: 0.45: 2.86 | 0.584        |
| 0.9: 0.1                  | 1: 0.07: 0.54: 2.46 | 0.885        |
